# Supplementary material for: Fabrication and Characterization of Poly (vinyl alcohol) and Chitosan Oligosaccharide-Based Blend Films
Source: MDPI journal article supplement (doi:10.3390/gels7020055), 2021-05-06
Supplement: s1 [file s1]

## Supplementary file

### 1. FTIR spectroscopy analysis

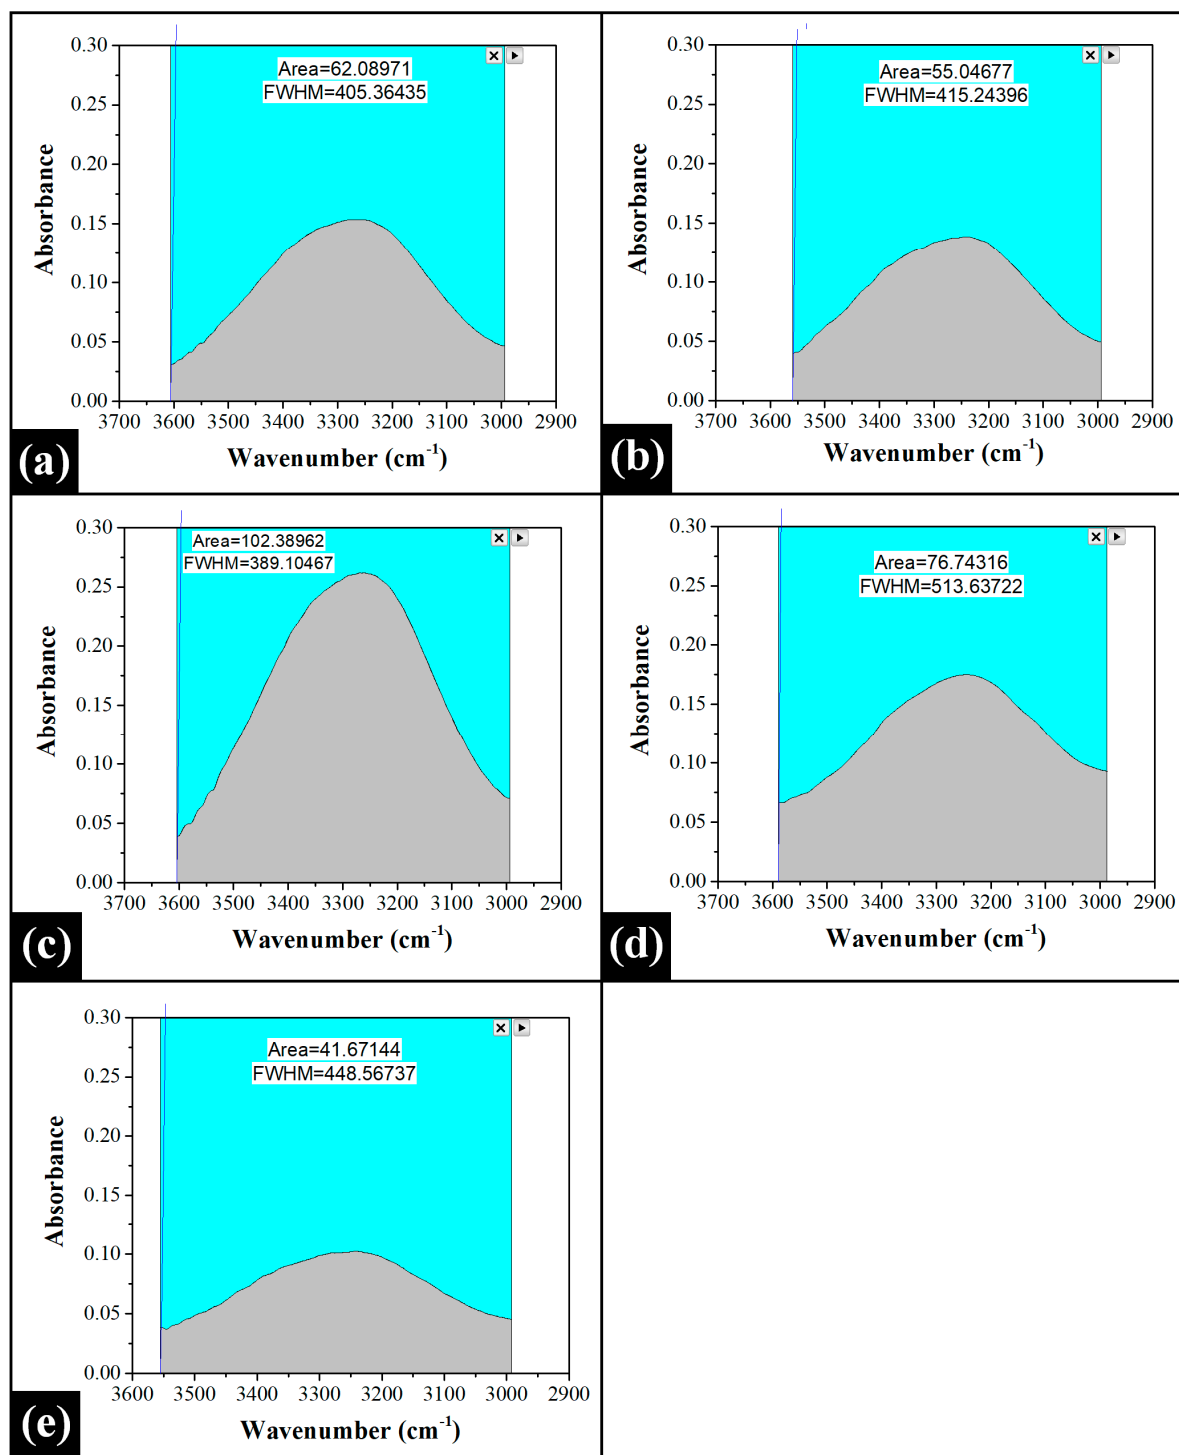

Figure S1. Area under the O-H stretching peak of the prepared films: (a) CP0, (b) CP1, (c) CP2, (d) CP3, and (e) CP4.

## 2. XRD analysis

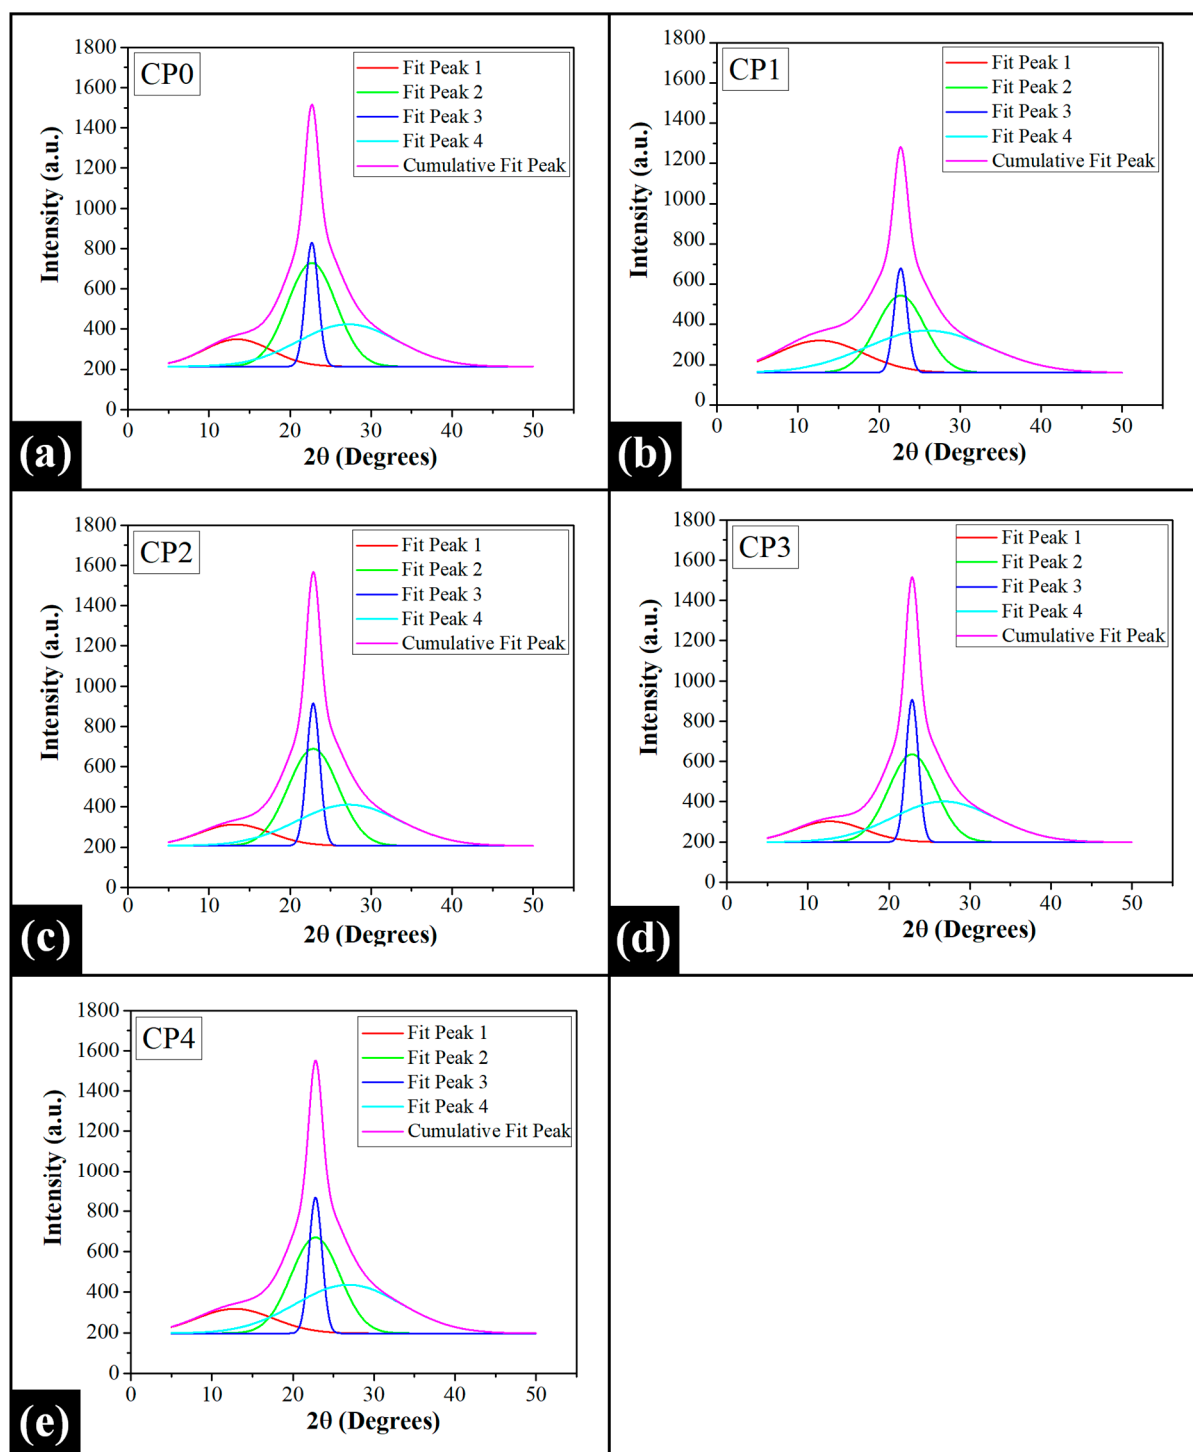

**Figure S2. Deconvoluted diffractograms of the prepared films: (a) CP0, (b) CP1, (c) CP2, (d) CP3, and (e) CP4.**

**Table S1. Parameters calculated from the deconvoluted peaks.**

| <b>Samples</b> | <b>% <math>\Delta</math>crystallinity</b> | <b>Peak height ratio</b> | <b>Degree of crystallinity (<math>X_c</math>)</b> |
|----------------|-------------------------------------------|--------------------------|---------------------------------------------------|
| <b>CP0</b>     | --                                        | 1.196                    | 53.232                                            |
| <b>CP1</b>     | -14.511                                   | 1.352                    | 55.525                                            |
| <b>CP2</b>     | 4.381                                     | 1.467                    | 57.021                                            |
| <b>CP3</b>     | 2.603                                     | 1.619                    | 58.773                                            |
| <b>CP4</b>     | 3.911                                     | 1.417                    | 56.416                                            |

### 3. Stress relaxation analysis

**Table S2. Stress relaxation parameters.**

| Analysis Model | Parameters                            | Film samples   |                |                |                |                |
|----------------|---------------------------------------|----------------|----------------|----------------|----------------|----------------|
|                |                                       | CP0            | CP1            | CP2            | CP3            | CP4            |
| --             | $\sigma_{\max}$ (Kg/mm <sup>2</sup> ) | 1.753 ± 0.307  | 1.932 ± 0.432  | 2.083 ± 0.088  | 1.972 ± 0.374  | 1.702 ± 0.217  |
|                | $\sigma_{\min}$ (Kg/mm <sup>2</sup> ) | 0.709 ± 0.181  | 0.794 ± 0.144  | 0.903 ± 0.045  | 0.906 ± 0.190  | 0.777 ± 0.097  |
|                | %SR                                   | 59.852 ± 3.837 | 58.613 ± 2.037 | 56.609 ± 0.712 | 54.179 ± 1.107 | 54.298 ± 0.442 |
| Wiechert model | P <sub>0</sub>                        | 0.401 ± 0.037  | 0.413 ± 0.020  | 0.433 ± 0.007  | 0.456 ± 0.010  | 0.455 ± 0.004  |
|                | P <sub>1</sub>                        | 0.304 ± 0.014  | 0.302 ± 0.011  | 0.292 ± 0.004  | 0.275 ± 0.005  | 0.277 ± 0.004  |
|                | $\tau_1$ (sec)                        | 1.254 ± 0.132  | 1.336 ± 0.036  | 1.377 ± 0.014  | 1.377 ± 0.082  | 1.430 ± 0.012  |
|                | P <sub>2</sub>                        | 0.220 ± 0.022  | 0.208 ± 0.008  | 0.204 ± 0.002  | 0.199 ± 0.001  | 0.200 ± 0.001  |
|                | $\tau_2$ (sec)                        | 15.888 ± 0.878 | 16.579 ± 0.260 | 16.849 ± 0.093 | 17.622 ± 0.364 | 17.549 ± 0.174 |
|                | R <sup>2</sup>                        | 0.998          | 0.998          | 0.998          | 0.998          | 0.998          |

#### 4. DSC analysis

**Table S3. DSC peak parameters**

| <b>Samples</b> | <b>T<sub>evap</sub> (°C)</b> | <b>T<sub>m</sub> (°C)</b> | <b>T<sub>c</sub> (°C)</b> |
|----------------|------------------------------|---------------------------|---------------------------|
| <b>CP0</b>     | 90                           | 221                       | 169                       |
| <b>CP1</b>     | 87                           | 219                       | 166                       |
| <b>CP2</b>     | 99                           | 217                       | 153                       |
| <b>CP3</b>     | 88                           | 222                       | 176                       |
| <b>CP4</b>     | 109                          | 214                       | 154                       |

## 5. Antimicrobial analysis

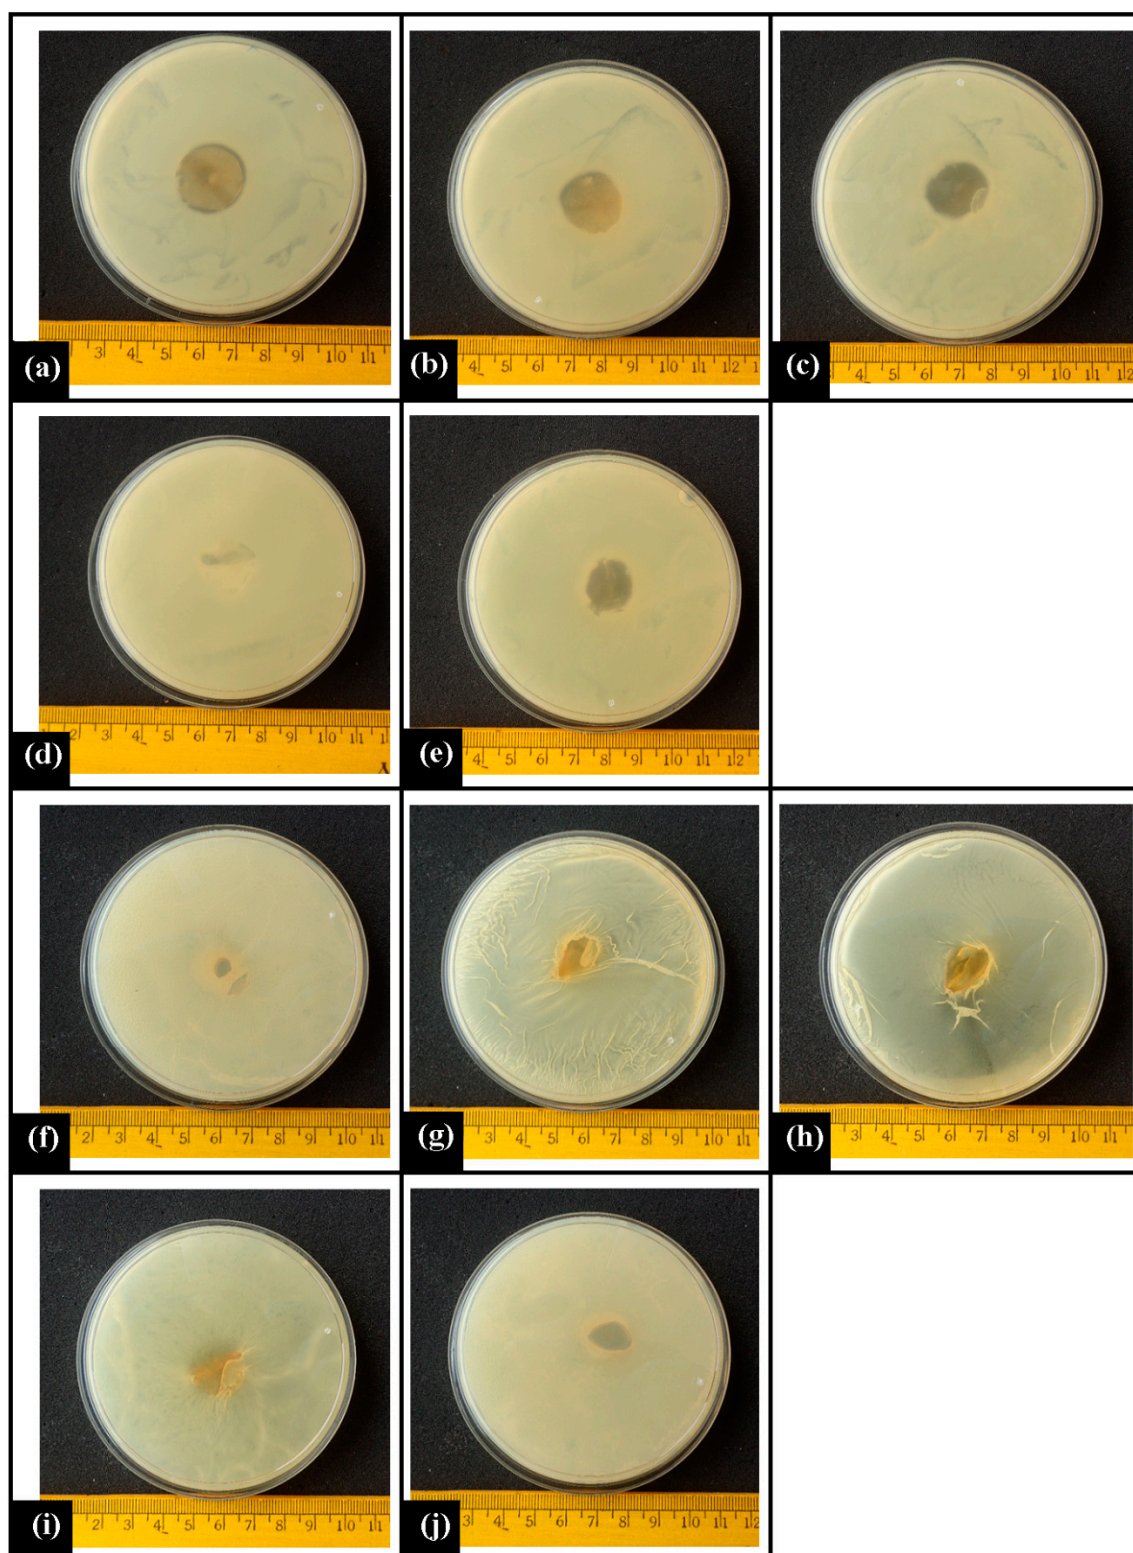

**Figure S3. Antimicrobial activity of the pristine films (without drug) against *E. coli*: (a) CP0, (b) CP1, (c) CP2, (d) CP3, (e) CP4; *B. cereus*: (f) CP0, (g) CP1, (h) CP2, (i) CP3, (j) CP4.**
